# Supplementary material for: A general strategy for synthesis of metal nanoparticles by a solid-state redox route under ambient conditions
Source: Royal Society of Chemistry journal article supplement (doi:10.1039/c3ta14427e), 2014-01-01
Supplement: c3ta14427e.pdf [file c3ta14427e.pdf]

## Supporting Information

### **A general strategy for synthesis of metal nanoparticles by a solid-state redox route under ambient conditions**

Yizhao Li, Yali Cao and Dianzeng Jia\*

Key laboratory of Material and Technology for Clean Energy, Ministry of Education, Key  
Laboratory of Advanced Functional Materials, Autonomous Region, Institute of Applied  
Chemistry, Xinjiang University, Urumqi, Xinjiang 830046, China

\*To whom correspondence should be addressed.

E-mail: [jdz@xju.edu.cn](mailto:jdz@xju.edu.cn) (Dianzeng Jia)

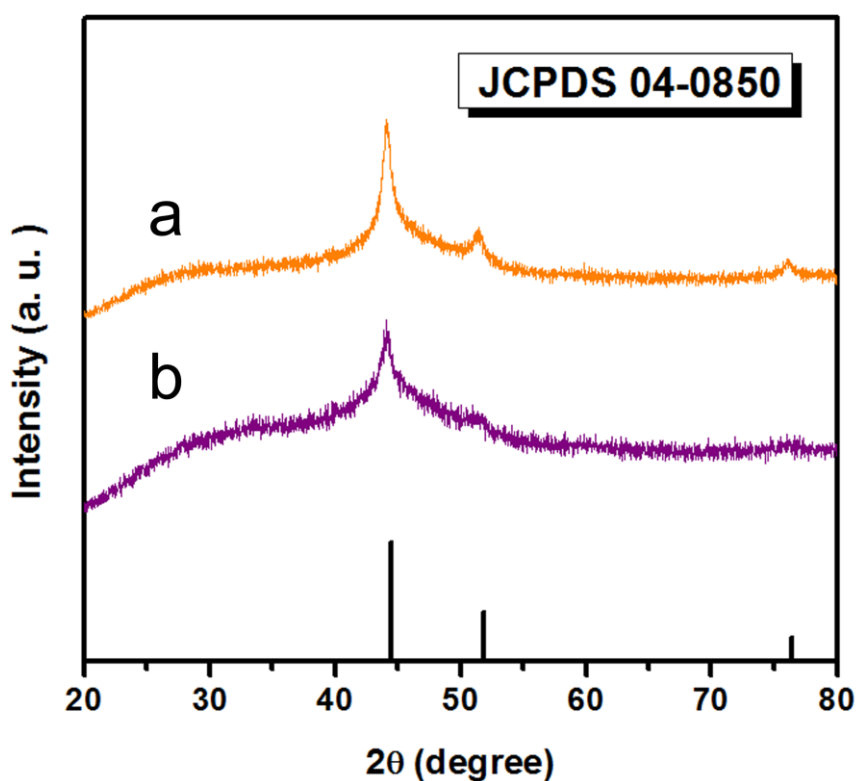

**Fig. S1** XRD patterns of Ni nanoparticles with different additives: a, Ni nanoparticles with NaCl; b, Ni nanoparticles with SDS.

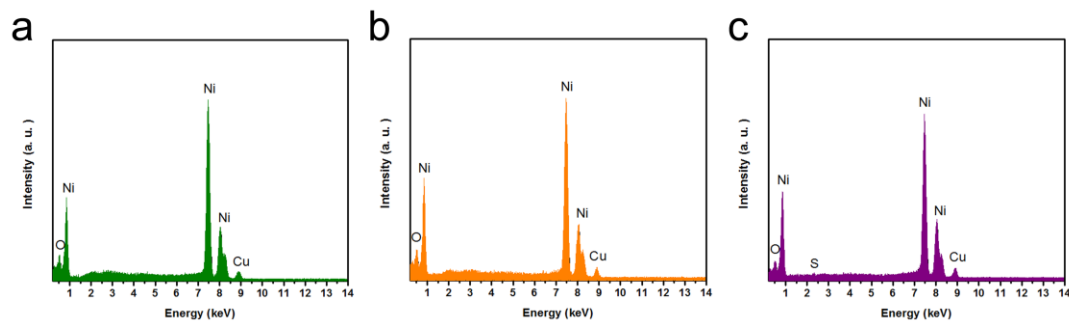

**Fig. S2** EDS patterns of Ni nanoparticles with different additives: a, Ni nanoparticles; b, Ni nanoparticles with NaCl; c, Ni nanoparticles with SDS.

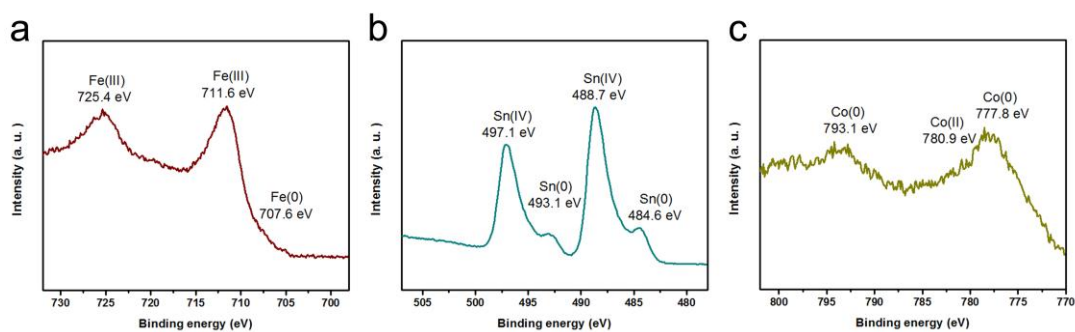

**Fig. S3** XPS spectra of Fe, Sn, and Co nanoparticles: a, detailed spectra of Fe 2p; b, detailed spectra of Sn 3d; c, detailed spectra of Co 2p.

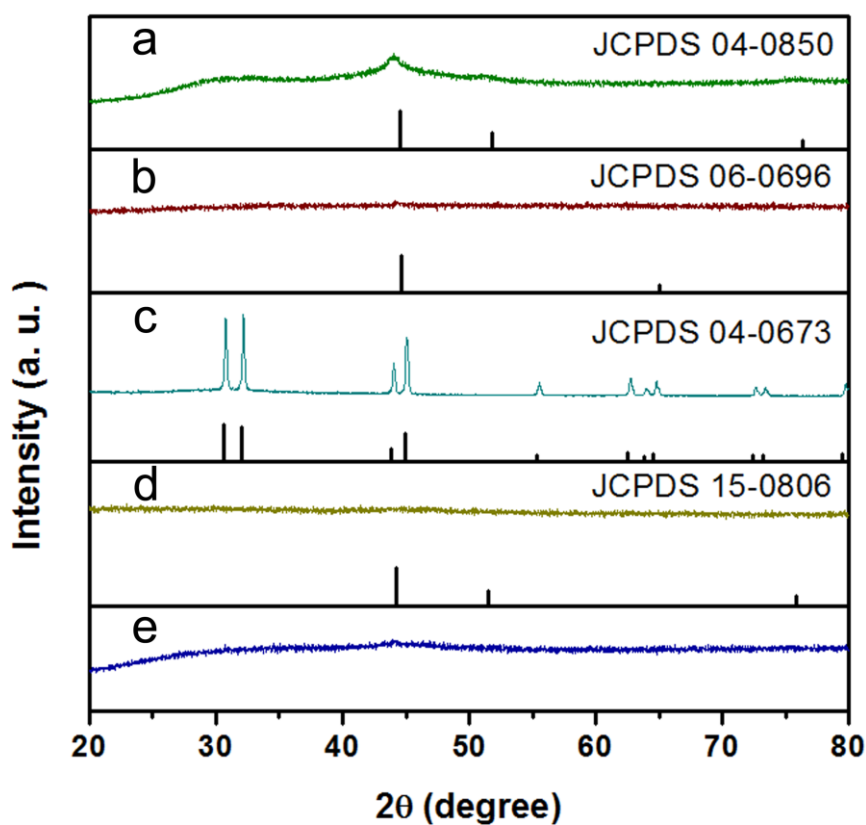

**Fig. S4** XRD patterns of the nanoparticles stored in air for two weeks: a, Ni nanoparticles; b, Fe nanoparticles; c, Sn nanoparticles; d, Co nanoparticles; e, NiCo nanoparticles.

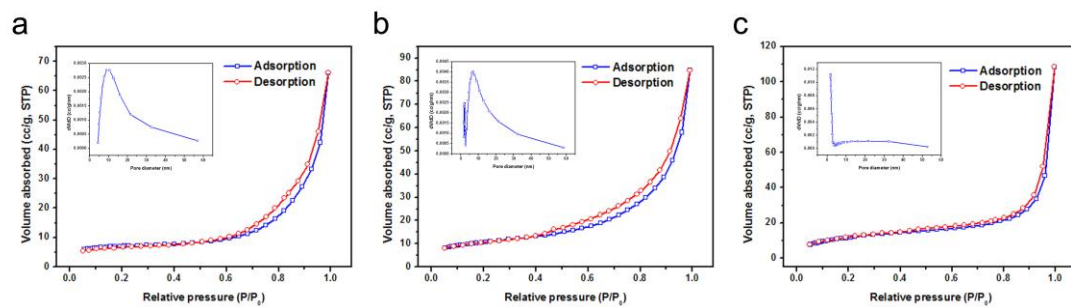

**Fig. S5** Nitrogen adsorption-desorption isotherms: a, Ni-1; b, Ni-2; c, Ni-3; the inset is the corresponding pore size distribution.
